# Supplementary material for: The effect of HIV status on the frequency and severity of acute respiratory illness
Source: PubMed Central journal article supplement (PMC7259631; doi:10.1371/journal.pone.0232977), 2020-05-29

# ACUTE RESPIRATORY ILLNESS SYMPTOM DIARY

## **Many thanks for participating in this study.**

You are completing this diary because you have told us that you currently have new respiratory symptoms (such as a cough, blocked nose or sore throat).

This diary will ask you to assess how severe these symptoms are each day, for up to 14 days, or until you feel back to normal.

Please complete this diary at the end of each day.

Please also contact the study team, to arrange a time to be reviewed and collect samples to see if we can detect any viruses or bacteria that might be causing your illness.

# DAY 1

Please tick which day:

Monday

Tuesday

Wednesday

Thursday

Friday

Saturday

Sunday

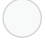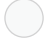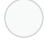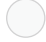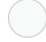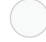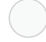

For each of the symptoms listed, please indicate how severe it is **today** by ticking one of the boxes in each row:

| SYMPTOM                                                | NO PROBLEM | MILD |   | MODERATE |   | SEVERE PROBLEM |   |
|--------------------------------------------------------|------------|------|---|----------|---|----------------|---|
|                                                        | 0          | 1    | 2 | 3        | 4 | 5              | 6 |
| Sore throat                                            |            |      |   |          |   |                |   |
| Blocked nose                                           |            |      |   |          |   |                |   |
| Fever or chills                                        |            |      |   |          |   |                |   |
| Cough                                                  |            |      |   |          |   |                |   |
| Producing more phlegm (sputum) than normal             |            |      |   |          |   |                |   |
| Shortness of breath                                    |            |      |   |          |   |                |   |
| Disturbed sleep                                        |            |      |   |          |   |                |   |
| Is your illness interfering with your normal activity? |            |      |   |          |   |                |   |
| Overall, how unwell do you feel?                       |            |      |   |          |   |                |   |

**Have you seen a doctor, nurse or pharmacist about this illness?  
(please tick)**

- No  Yes, a pharmacist  Yes a nurse in my GP practice  Yes, in a hospital clinic   
Yes a doctor in my GP practice  Yes, in a hospital accident and emergency department

**Are you taking any treatment for this illness?  
(please tick)**

- No  Yes, over the counter from a pharmacy  Yes, I am taking antibiotics

Yes, other treatment.  
Please state

## DAY 2

Please tick which day:

Monday

Tuesday

Wednesday

Thursday

Friday

Saturday

Sunday








For each of the symptoms listed, please indicate how severe it is **today** by ticking one of the boxes in each row:

| SYMPTOM                                                | NO PROBLEM | MILD |   | MODERATE |   | SEVERE PROBLEM |   |
|--------------------------------------------------------|------------|------|---|----------|---|----------------|---|
|                                                        | 0          | 1    | 2 | 3        | 4 | 5              | 6 |
| Sore throat                                            |            |      |   |          |   |                |   |
| Blocked nose                                           |            |      |   |          |   |                |   |
| Fever or chills                                        |            |      |   |          |   |                |   |
| Cough                                                  |            |      |   |          |   |                |   |
| Producing more phlegm (sputum) than normal             |            |      |   |          |   |                |   |
| Shortness of breath                                    |            |      |   |          |   |                |   |
| Disturbed sleep                                        |            |      |   |          |   |                |   |
| Is your illness interfering with your normal activity? |            |      |   |          |   |                |   |
| Overall, how unwell do you feel?                       |            |      |   |          |   |                |   |

**Have you seen a doctor, nurse or pharmacist about this illness?  
(please tick)**

- No  Yes, a pharmacist  Yes a nurse in my GP practice  Yes, in a hospital clinic   
Yes a doctor in my GP practice  Yes, in a hospital accident and emergency department

**Are you taking any treatment for this illness?  
(please tick)**

- No  Yes, over the counter from a pharmacy  Yes, I am taking antibiotics

Yes, other treatment.  
Please state

## DAY 3

Please tick which day:

Monday

Tuesday

Wednesday

Thursday

Friday

Saturday

Sunday

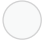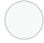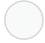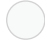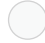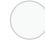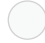

For each of the symptoms listed, please indicate how severe it is **today** by ticking one of the boxes in each row:

| SYMPTOM                                                | NO PROBLEM | MILD |   | MODERATE |   | SEVERE PROBLEM |   |
|--------------------------------------------------------|------------|------|---|----------|---|----------------|---|
|                                                        | 0          | 1    | 2 | 3        | 4 | 5              | 6 |
| Sore throat                                            |            |      |   |          |   |                |   |
| Blocked nose                                           |            |      |   |          |   |                |   |
| Fever or chills                                        |            |      |   |          |   |                |   |
| Cough                                                  |            |      |   |          |   |                |   |
| Producing more phlegm (sputum) than normal             |            |      |   |          |   |                |   |
| Shortness of breath                                    |            |      |   |          |   |                |   |
| Disturbed sleep                                        |            |      |   |          |   |                |   |
| Is your illness interfering with your normal activity? |            |      |   |          |   |                |   |
| Overall, how unwell do you feel?                       |            |      |   |          |   |                |   |

**Have you seen a doctor, nurse or pharmacist about this illness?  
(please tick)**

- No  Yes, a pharmacist  Yes a nurse in my GP practice  Yes, in a hospital clinic   
Yes a doctor in my GP practice  Yes, in a hospital accident and emergency department

**Are you taking any treatment for this illness?  
(please tick)**

- No  Yes, over the counter from a pharmacy  Yes, I am taking antibiotics

Yes, other treatment.  
Please state

# DAY 4

Please tick which day:

Monday

Tuesday

Wednesday

Thursday

Friday

Saturday

Sunday

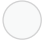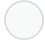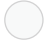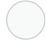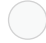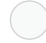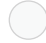

For each of the symptoms listed, please indicate how severe it is **today** by ticking one of the boxes in each row:

| SYMPTOM                                                | NO PROBLEM | MILD |   | MODERATE |   | SEVERE PROBLEM |   |
|--------------------------------------------------------|------------|------|---|----------|---|----------------|---|
|                                                        | 0          | 1    | 2 | 3        | 4 | 5              | 6 |
| Sore throat                                            |            |      |   |          |   |                |   |
| Blocked nose                                           |            |      |   |          |   |                |   |
| Fever or chills                                        |            |      |   |          |   |                |   |
| Cough                                                  |            |      |   |          |   |                |   |
| Producing more phlegm (sputum) than normal             |            |      |   |          |   |                |   |
| Shortness of breath                                    |            |      |   |          |   |                |   |
| Disturbed sleep                                        |            |      |   |          |   |                |   |
| Is your illness interfering with your normal activity? |            |      |   |          |   |                |   |
| Overall, how unwell do you feel?                       |            |      |   |          |   |                |   |



**Have you seen a doctor, nurse or pharmacist about this illness?  
(please tick)**

- No  Yes, a pharmacist  Yes a nurse in my GP practice  Yes, in a hospital clinic   
Yes a doctor in my GP practice  Yes, in a hospital accident and emergency department

**Are you taking any treatment for this illness?  
(please tick)**

- No  Yes, over the counter from a pharmacy  Yes, I am taking antibiotics

Yes, other treatment.  
Please state

# DAY 5

Please tick which day:

Monday

Tuesday

Wednesday

Thursday

Friday

Saturday

Sunday



For each of the symptoms listed, please indicate how severe it is **today** by ticking one of the boxes in each row:

| SYMPTOM                                                | NO PROBLEM | MILD |   | MODERATE |   | SEVERE PROBLEM |   |
|--------------------------------------------------------|------------|------|---|----------|---|----------------|---|
|                                                        | 0          | 1    | 2 | 3        | 4 | 5              | 6 |
| Sore throat                                            |            |      |   |          |   |                |   |
| Blocked nose                                           |            |      |   |          |   |                |   |
| Fever or chills                                        |            |      |   |          |   |                |   |
| Cough                                                  |            |      |   |          |   |                |   |
| Producing more phlegm (sputum) than normal             |            |      |   |          |   |                |   |
| Shortness of breath                                    |            |      |   |          |   |                |   |
| Disturbed sleep                                        |            |      |   |          |   |                |   |
| Is your illness interfering with your normal activity? |            |      |   |          |   |                |   |
| Overall, how unwell do you feel?                       |            |      |   |          |   |                |   |

**Have you seen a doctor, nurse or pharmacist about this illness?  
(please tick)**

- No  Yes, a pharmacist  Yes a nurse in my GP practice  Yes, in a hospital clinic   
Yes a doctor in my GP practice  Yes, in a hospital accident and emergency department

**Are you taking any treatment for this illness?  
(please tick)**

- No  Yes, over the counter from a pharmacy  Yes, I am taking antibiotics

Yes, other treatment.  
Please state

## DAY 6

Please tick which day:

Monday

Tuesday

Wednesday

Thursday

Friday

Saturday

Sunday

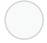

For each of the symptoms listed, please indicate how severe it is **today** by ticking one of the boxes in each row:

| SYMPTOM                                                | NO PROBLEM | MILD |   | MODERATE |   | SEVERE PROBLEM |   |
|--------------------------------------------------------|------------|------|---|----------|---|----------------|---|
|                                                        | 0          | 1    | 2 | 3        | 4 | 5              | 6 |
| Sore throat                                            |            |      |   |          |   |                |   |
| Blocked nose                                           |            |      |   |          |   |                |   |
| Fever or chills                                        |            |      |   |          |   |                |   |
| Cough                                                  |            |      |   |          |   |                |   |
| Producing more phlegm (sputum) than normal             |            |      |   |          |   |                |   |
| Shortness of breath                                    |            |      |   |          |   |                |   |
| Disturbed sleep                                        |            |      |   |          |   |                |   |
| Is your illness interfering with your normal activity? |            |      |   |          |   |                |   |
| Overall, how unwell do you feel?                       |            |      |   |          |   |                |   |

**Have you seen a doctor, nurse or pharmacist about this illness?  
(please tick)**

- No  Yes, a pharmacist  Yes a nurse in my GP practice  Yes, in a hospital clinic   
Yes a doctor in my GP practice  Yes, in a hospital accident and emergency department

**Are you taking any treatment for this illness?  
(please tick)**

- No  Yes, over the counter from a pharmacy  Yes, I am taking antibiotics

Yes, other treatment.  
Please state

# DAY 7

Please tick which day:

Monday

Tuesday

Wednesday

Thursday

Friday

Saturday

Sunday



For each of the symptoms listed, please indicate how severe it is **today** by ticking one of the boxes in each row:

| SYMPTOM                                                | NO PROBLEM | MILD |   | MODERATE |   | SEVERE PROBLEM |   |
|--------------------------------------------------------|------------|------|---|----------|---|----------------|---|
|                                                        | 0          | 1    | 2 | 3        | 4 | 5              | 6 |
| Sore throat                                            |            |      |   |          |   |                |   |
| Blocked nose                                           |            |      |   |          |   |                |   |
| Fever or chills                                        |            |      |   |          |   |                |   |
| Cough                                                  |            |      |   |          |   |                |   |
| Producing more phlegm (sputum) than normal             |            |      |   |          |   |                |   |
| Shortness of breath                                    |            |      |   |          |   |                |   |
| Disturbed sleep                                        |            |      |   |          |   |                |   |
| Is your illness interfering with your normal activity? |            |      |   |          |   |                |   |
| Overall, how unwell do you feel?                       |            |      |   |          |   |                |   |

**Have you seen a doctor, nurse or pharmacist about this illness?  
(please tick)**

- No  Yes, a pharmacist  Yes a nurse in my GP practice  Yes, in a hospital clinic   
Yes a doctor in my GP practice  Yes, in a hospital accident and emergency department

**Are you taking any treatment for this illness?  
(please tick)**

- No  Yes, over the counter from a pharmacy  Yes, I am taking antibiotics

Yes, other treatment.  
Please state

# DAY 8

Please tick which day:

Monday

Tuesday

Wednesday

Thursday

Friday

Saturday

Sunday

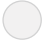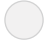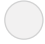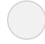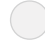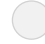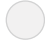

For each of the symptoms listed, please indicate how severe it is **today** by ticking one of the boxes in each row:

| SYMPTOM                                                | NO PROBLEM | MILD |   | MODERATE |   | SEVERE PROBLEM |   |
|--------------------------------------------------------|------------|------|---|----------|---|----------------|---|
|                                                        | 0          | 1    | 2 | 3        | 4 | 5              | 6 |
| Sore throat                                            |            |      |   |          |   |                |   |
| Blocked nose                                           |            |      |   |          |   |                |   |
| Fever or chills                                        |            |      |   |          |   |                |   |
| Cough                                                  |            |      |   |          |   |                |   |
| Producing more phlegm (sputum) than normal             |            |      |   |          |   |                |   |
| Shortness of breath                                    |            |      |   |          |   |                |   |
| Disturbed sleep                                        |            |      |   |          |   |                |   |
| Is your illness interfering with your normal activity? |            |      |   |          |   |                |   |
| Overall, how unwell do you feel?                       |            |      |   |          |   |                |   |



**Have you seen a doctor, nurse or pharmacist about this illness?  
(please tick)**

- No  Yes, a pharmacist  Yes a nurse in my GP practice  Yes, in a hospital clinic   
Yes a doctor in my GP practice  Yes, in a hospital accident and emergency department

**Are you taking any treatment for this illness?  
(please tick)**

- No  Yes, over the counter from a pharmacy  Yes, I am taking antibiotics

Yes, other treatment.  
Please state

# DAY 9

Please tick which day:

Monday

Tuesday

Wednesday

Thursday

Friday

Saturday

Sunday

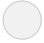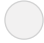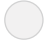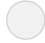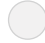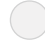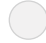

For each of the symptoms listed, please indicate how severe it is **today** by ticking one of the boxes in each row:

| SYMPTOM                                                | NO PROBLEM | MILD |   | MODERATE |   | SEVERE PROBLEM |   |
|--------------------------------------------------------|------------|------|---|----------|---|----------------|---|
|                                                        | 0          | 1    | 2 | 3        | 4 | 5              | 6 |
| Sore throat                                            |            |      |   |          |   |                |   |
| Blocked nose                                           |            |      |   |          |   |                |   |
| Fever or chills                                        |            |      |   |          |   |                |   |
| Cough                                                  |            |      |   |          |   |                |   |
| Producing more phlegm (sputum) than normal             |            |      |   |          |   |                |   |
| Shortness of breath                                    |            |      |   |          |   |                |   |
| Disturbed sleep                                        |            |      |   |          |   |                |   |
| Is your illness interfering with your normal activity? |            |      |   |          |   |                |   |
| Overall, how unwell do you feel?                       |            |      |   |          |   |                |   |

**Have you seen a doctor, nurse or pharmacist about this illness?  
(please tick)**

- No  Yes, a pharmacist  Yes a nurse in my GP practice  Yes, in a hospital clinic   
Yes a doctor in my GP practice  Yes, in a hospital accident and emergency department

**Are you taking any treatment for this illness?  
(please tick)**

- No  Yes, over the counter from a pharmacy  Yes, I am taking antibiotics

Yes, other treatment.  
Please state

# DAY 10

Please tick which day:

Monday

Tuesday

Wednesday

Thursday

Friday

Saturday

Sunday

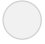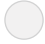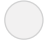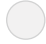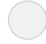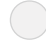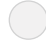

For each of the symptoms listed, please indicate how severe it is **today** by ticking one of the boxes in each row:

| SYMPTOM                                                | NO PROBLEM | MILD |   | MODERATE |   | SEVERE PROBLEM |   |
|--------------------------------------------------------|------------|------|---|----------|---|----------------|---|
|                                                        | 0          | 1    | 2 | 3        | 4 | 5              | 6 |
| Sore throat                                            |            |      |   |          |   |                |   |
| Blocked nose                                           |            |      |   |          |   |                |   |
| Fever or chills                                        |            |      |   |          |   |                |   |
| Cough                                                  |            |      |   |          |   |                |   |
| Producing more phlegm (sputum) than normal             |            |      |   |          |   |                |   |
| Shortness of breath                                    |            |      |   |          |   |                |   |
| Disturbed sleep                                        |            |      |   |          |   |                |   |
| Is your illness interfering with your normal activity? |            |      |   |          |   |                |   |
| Overall, how unwell do you feel?                       |            |      |   |          |   |                |   |

**Have you seen a doctor, nurse or pharmacist about this illness?  
(please tick)**

- No  Yes, a pharmacist  Yes a nurse in my GP practice  Yes, in a hospital clinic   
Yes a doctor in my GP practice  Yes, in a hospital accident and emergency department

**Are you taking any treatment for this illness?  
(please tick)**

- No  Yes, over the counter from a pharmacy  Yes, I am taking antibiotics

Yes, other treatment.  
Please state

# DAY 11

Please tick which day:

Monday

Tuesday

Wednesday

Thursday

Friday

Saturday

Sunday

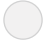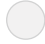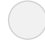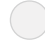

For each of the symptoms listed, please indicate how severe it is **today** by ticking one of the boxes in each row:

| SYMPTOM                                                | NO PROBLEM | MILD |   | MODERATE |   | SEVERE PROBLEM |   |
|--------------------------------------------------------|------------|------|---|----------|---|----------------|---|
|                                                        | 0          | 1    | 2 | 3        | 4 | 5              | 6 |
| Sore throat                                            |            |      |   |          |   |                |   |
| Blocked nose                                           |            |      |   |          |   |                |   |
| Fever or chills                                        |            |      |   |          |   |                |   |
| Cough                                                  |            |      |   |          |   |                |   |
| Producing more phlegm (sputum) than normal             |            |      |   |          |   |                |   |
| Shortness of breath                                    |            |      |   |          |   |                |   |
| Disturbed sleep                                        |            |      |   |          |   |                |   |
| Is your illness interfering with your normal activity? |            |      |   |          |   |                |   |
| Overall, how unwell do you feel?                       |            |      |   |          |   |                |   |

**Have you seen a doctor, nurse or pharmacist about this illness?  
(please tick)**

- No  Yes, a pharmacist  Yes a nurse in my GP practice  Yes, in a hospital clinic   
Yes a doctor in my GP practice  Yes, in a hospital accident and emergency department

**Are you taking any treatment for this illness?  
(please tick)**

- No  Yes, over the counter from a pharmacy  Yes, I am taking antibiotics

Yes, other treatment.  
Please state

# DAY 12

Please tick which day:

Monday

Tuesday

Wednesday

Thursday

Friday

Saturday

Sunday

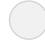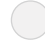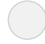

For each of the symptoms listed, please indicate how severe it is **today** by ticking one of the boxes in each row:

| SYMPTOM                                                | NO PROBLEM | MILD |   | MODERATE |   | SEVERE PROBLEM |   |
|--------------------------------------------------------|------------|------|---|----------|---|----------------|---|
|                                                        | 0          | 1    | 2 | 3        | 4 | 5              | 6 |
| Sore throat                                            |            |      |   |          |   |                |   |
| Blocked nose                                           |            |      |   |          |   |                |   |
| Fever or chills                                        |            |      |   |          |   |                |   |
| Cough                                                  |            |      |   |          |   |                |   |
| Producing more phlegm (sputum) than normal             |            |      |   |          |   |                |   |
| Shortness of breath                                    |            |      |   |          |   |                |   |
| Disturbed sleep                                        |            |      |   |          |   |                |   |
| Is your illness interfering with your normal activity? |            |      |   |          |   |                |   |
| Overall, how unwell do you feel?                       |            |      |   |          |   |                |   |



**Have you seen a doctor, nurse or pharmacist about this illness?  
(please tick)**

- No  Yes, a pharmacist  Yes a nurse in my GP practice  Yes, in a hospital clinic   
Yes a doctor in my GP practice  Yes, in a hospital accident and emergency department

**Are you taking any treatment for this illness?  
(please tick)**

- No  Yes, over the counter from a pharmacy  Yes, I am taking antibiotics

Yes, other treatment.  
Please state

# DAY 13

Please tick which day:

Monday

Tuesday

Wednesday

Thursday

Friday

Saturday

Sunday



For each of the symptoms listed, please indicate how severe it is **today** by ticking one of the boxes in each row:

| SYMPTOM                                                | NO PROBLEM | MILD |   | MODERATE |   | SEVERE PROBLEM |   |
|--------------------------------------------------------|------------|------|---|----------|---|----------------|---|
|                                                        | 0          | 1    | 2 | 3        | 4 | 5              | 6 |
| Sore throat                                            |            |      |   |          |   |                |   |
| Blocked nose                                           |            |      |   |          |   |                |   |
| Fever or chills                                        |            |      |   |          |   |                |   |
| Cough                                                  |            |      |   |          |   |                |   |
| Producing more phlegm (sputum) than normal             |            |      |   |          |   |                |   |
| Shortness of breath                                    |            |      |   |          |   |                |   |
| Disturbed sleep                                        |            |      |   |          |   |                |   |
| Is your illness interfering with your normal activity? |            |      |   |          |   |                |   |
| Overall, how unwell do you feel?                       |            |      |   |          |   |                |   |

**Have you seen a doctor, nurse or pharmacist about this illness?  
(please tick)**

- No  Yes, a pharmacist  Yes a nurse in my GP practice  Yes, in a hospital clinic   
Yes a doctor in my GP practice  Yes, in a hospital accident and emergency department

**Are you taking any treatment for this illness?  
(please tick)**

- No  Yes, over the counter from a pharmacy  Yes, I am taking antibiotics

Yes, other treatment.  
Please state

# DAY 14

Please tick which day:

Monday

Tuesday

Wednesday

Thursday

Friday

Saturday

Sunday



For each of the symptoms listed, please indicate how severe it is **today** by ticking one of the boxes in each row:

| SYMPTOM                                                | NO PROBLEM | MILD |   | MODERATE |   | SEVERE PROBLEM |   |
|--------------------------------------------------------|------------|------|---|----------|---|----------------|---|
|                                                        | 0          | 1    | 2 | 3        | 4 | 5              | 6 |
| Sore throat                                            |            |      |   |          |   |                |   |
| Blocked nose                                           |            |      |   |          |   |                |   |
| Fever or chills                                        |            |      |   |          |   |                |   |
| Cough                                                  |            |      |   |          |   |                |   |
| Producing more phlegm (sputum) than normal             |            |      |   |          |   |                |   |
| Shortness of breath                                    |            |      |   |          |   |                |   |
| Disturbed sleep                                        |            |      |   |          |   |                |   |
| Is your illness interfering with your normal activity? |            |      |   |          |   |                |   |
| Overall, how unwell do you feel?                       |            |      |   |          |   |                |   |

**Have you seen a doctor, nurse or pharmacist about this illness?  
(please tick)**

- No  Yes, a pharmacist  Yes a nurse in my GP practice  Yes, in a hospital clinic   
Yes a doctor in my GP practice  Yes, in a hospital accident and emergency department

**Are you taking any treatment for this illness?  
(please tick)**

- No  Yes, over the counter from a pharmacy  Yes, I am taking antibiotics

Yes, other treatment.  
Please state



## Many thanks for completing this diary.

If you have not already made arrangements to return this to the study team, please contact us by email at: **rf.acuterespiratory@nhs.net** or phone us on: **07468 934026** (you can call any time, please leave a message and we'll get back to you).

The acute respiratory illness project is funded by the National Institute for Health Research's Doctoral Research Fellowship Programme and the British HIV Association Research Award.

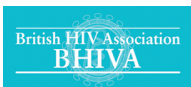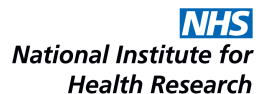

Supplement: pone.0232977.s002.pdf [file pone.0232977.s002.pdf]
